# Supplementary material for: Effect of Intensive Glycemic Control on Myocardial Infarction Outcome in Patients with Type 2 Diabetes Mellitus: A Systematic Review and Meta-Analysis
Source: Hindawi journal article supplement (doi:10.1155/2023/8818502), 2023-02-24
Supplement: f1 [file 8818502.f1.zip]

|                        | Random sequence generation (selection bias) | Allocation concealment (selection bias) | Blinding of participants and personnel (performance bias) | Blinding of outcome assessment (detection bias) | Incomplete outcome data (attrition bias) | Selective reporting (reporting bias) | Other bias |
|------------------------|---------------------------------------------|-----------------------------------------|-----------------------------------------------------------|-------------------------------------------------|------------------------------------------|--------------------------------------|------------|
| ACCORD 2008            | +                                           | +                                       | +                                                         | ?                                               | +                                        | ?                                    | +          |
| ADVANCE 2008           | +                                           | +                                       | +                                                         | ?                                               | +                                        | ?                                    | +          |
| CANVAS 2017            | +                                           | +                                       | ?                                                         | ?                                               | +                                        | ?                                    | +          |
| CARMELINA 2019         | +                                           | +                                       | +                                                         | +                                               | +                                        | +                                    | +          |
| DECLARE – TIMI 58 2018 | +                                           | +                                       | +                                                         | +                                               | +                                        | +                                    | +          |
| EMPA-REG OUTCOME 2015  | +                                           | +                                       | +                                                         | +                                               | +                                        | +                                    | +          |
| EXAMINE 2013           | ?                                           | ?                                       | +                                                         | +                                               | +                                        | +                                    | +          |
| EXSCEL 2017            | +                                           | ?                                       | +                                                         | +                                               | +                                        | ?                                    | ?          |
| Harmony Outcomes 2018  | +                                           | +                                       | +                                                         | ?                                               | +                                        | ?                                    | ?          |
| LEADER 2016            | ?                                           | ?                                       | +                                                         | +                                               | +                                        | +                                    | ?          |
| REWIND 2019            | +                                           | +                                       | +                                                         | +                                               | +                                        | +                                    | +          |
| SAVOR-TIMI 53 2013     | +                                           | +                                       | +                                                         | +                                               | +                                        | +                                    | +          |
| TECOS 2015             | ?                                           | +                                       | +                                                         | +                                               | +                                        | +                                    | +          |
| VADT 2009              | +                                           | -                                       | ?                                                         | ?                                               | +                                        | ?                                    | ?          |
