# Supplementary figures and images for: Effect of Intensive Glycemic Control on Myocardial Infarction Outcome in Patients with Type 2 Diabetes Mellitus: A Systematic Review and Meta-Analysis
Source: Hindawi journal article supplement (doi:10.1155/2023/8818502), 2023-02-24

a

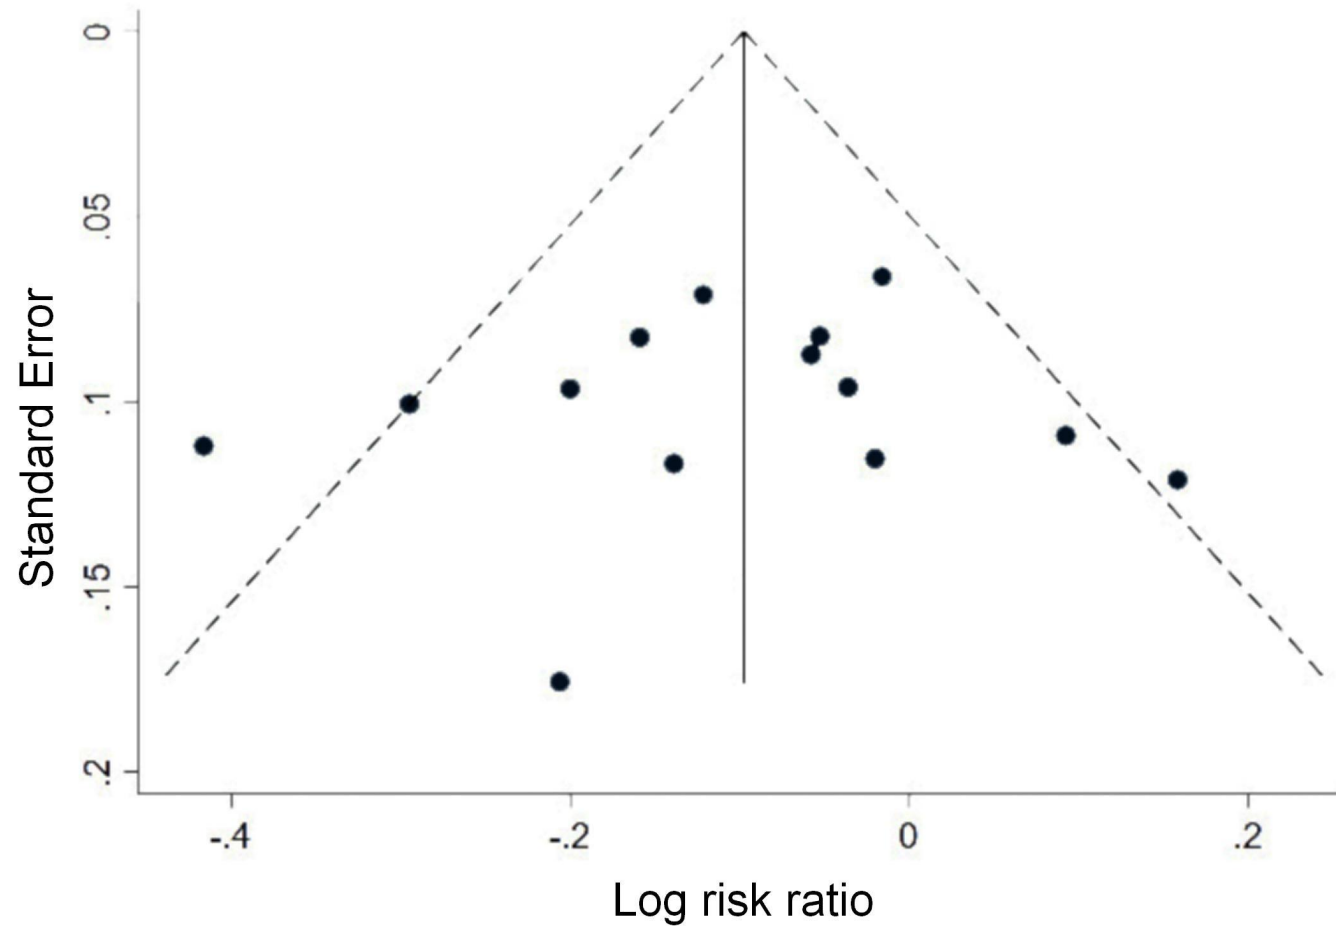

Egger's regression asymmetry test  
( $P=0.662$ , intercept=-0.45, 95%CI=-4.40 to 2.92)

Supplement: f1 [file 8818502.f1.zip]

C

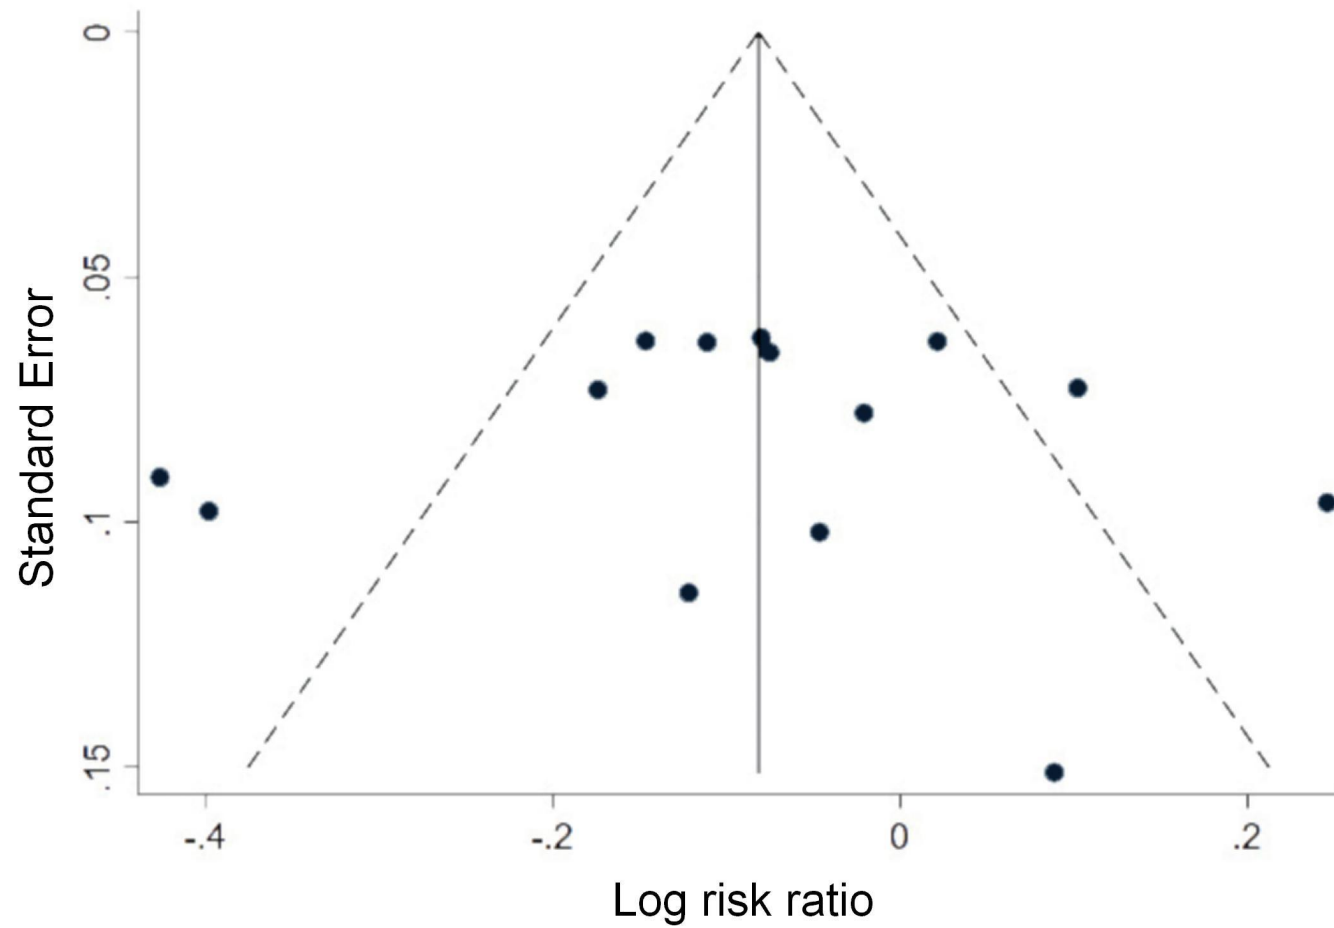

Egger's regression asymmetry test  
( $P=0.913$ , intercept=-0.11, 95%CI=-5.44 to 4.91)

Supplement: f1 [file 8818502.f1.zip]

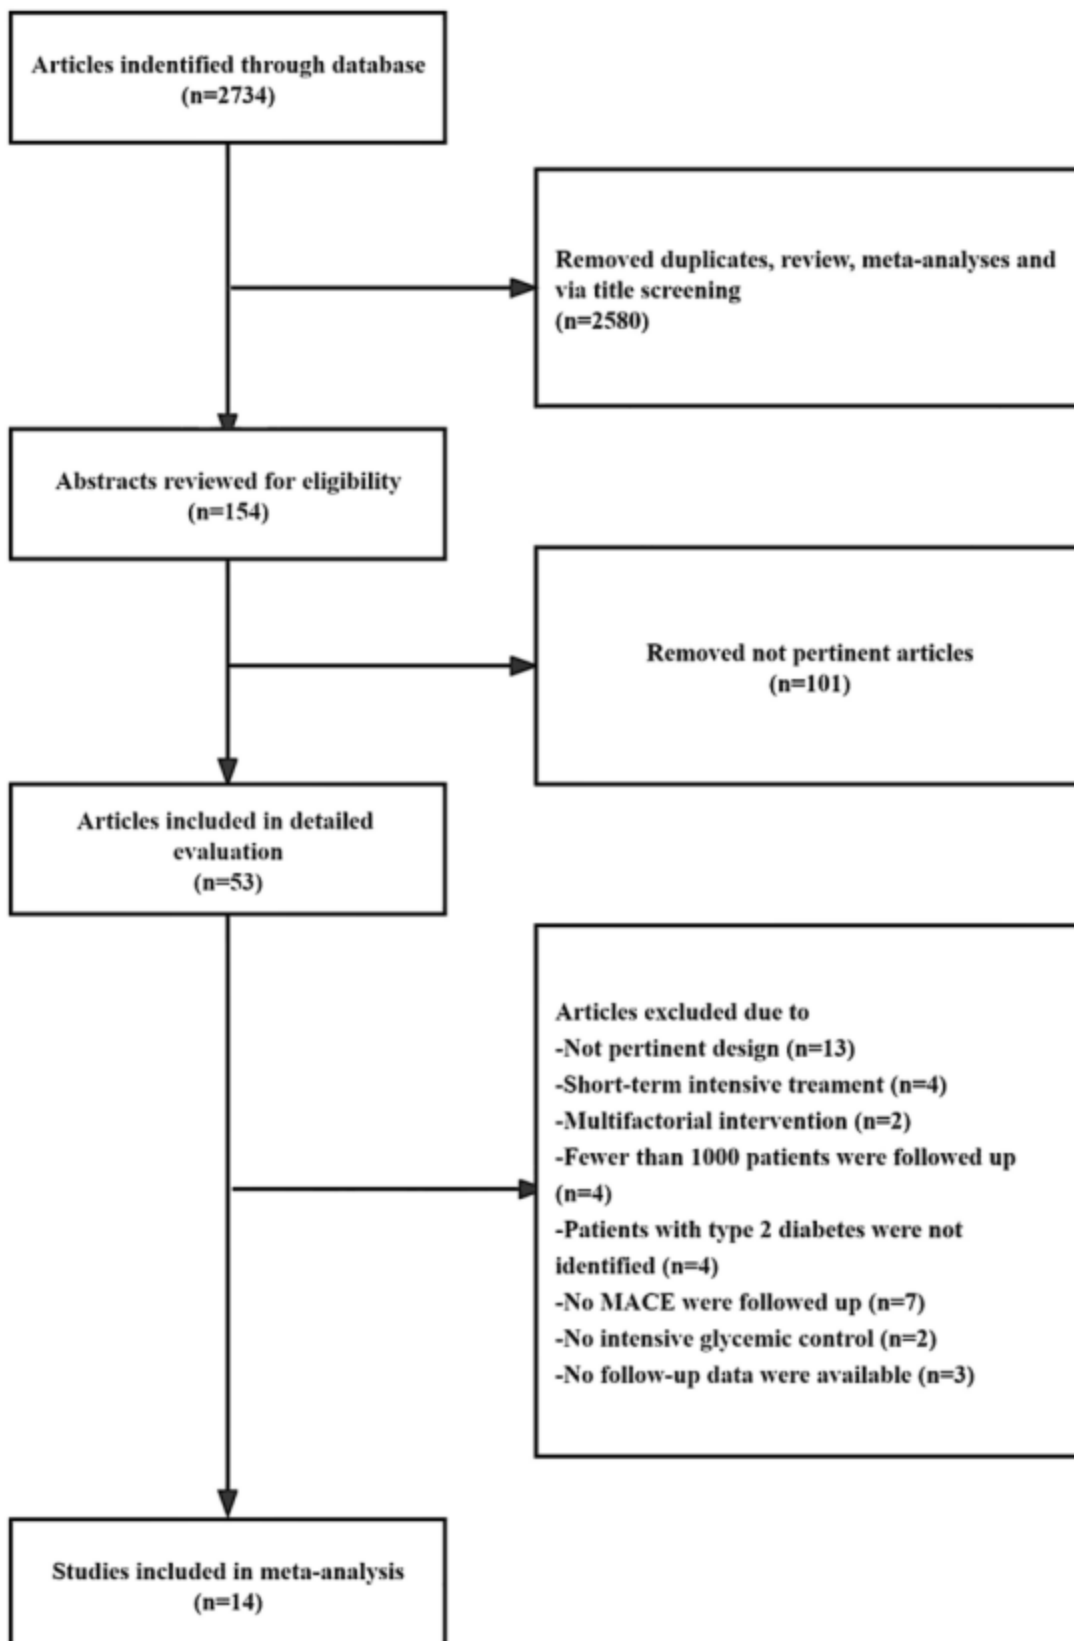

Supplement: f1 [file 8818502.f1.zip]

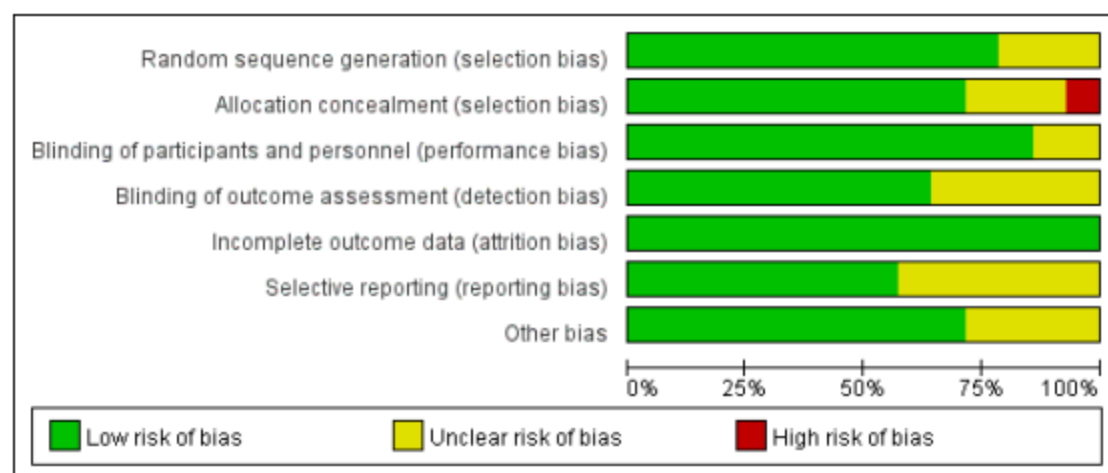

Supplement: f1 [file 8818502.f1.zip]

a

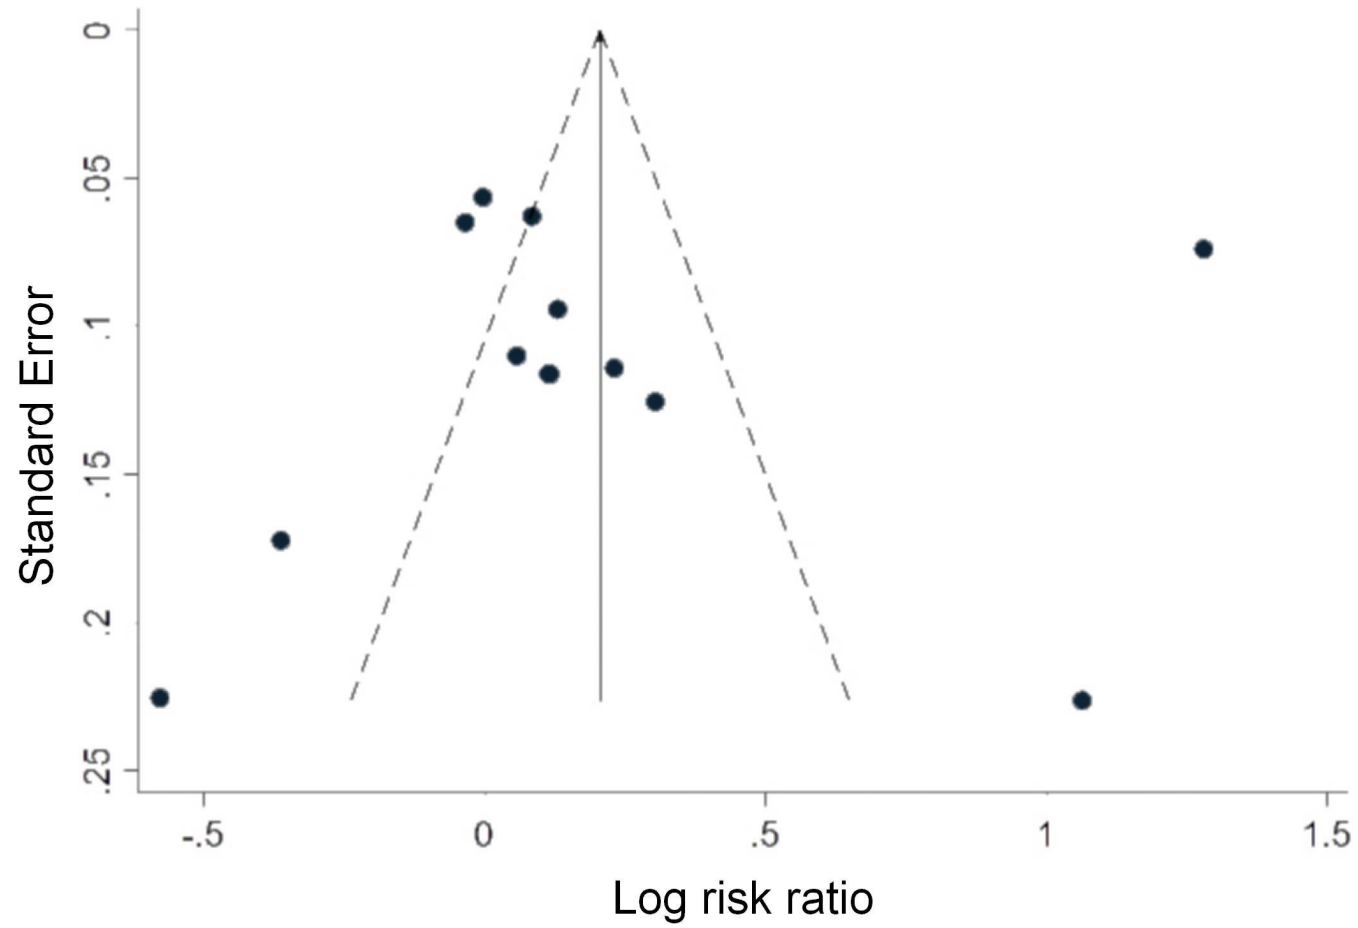

Egger's regression asymmetry test  
( $P=0.949$ , intercept=-0.06, 95%CI=-8.34 to 7.86)

Supplement: f1 [file 8818502.f1.zip]

b

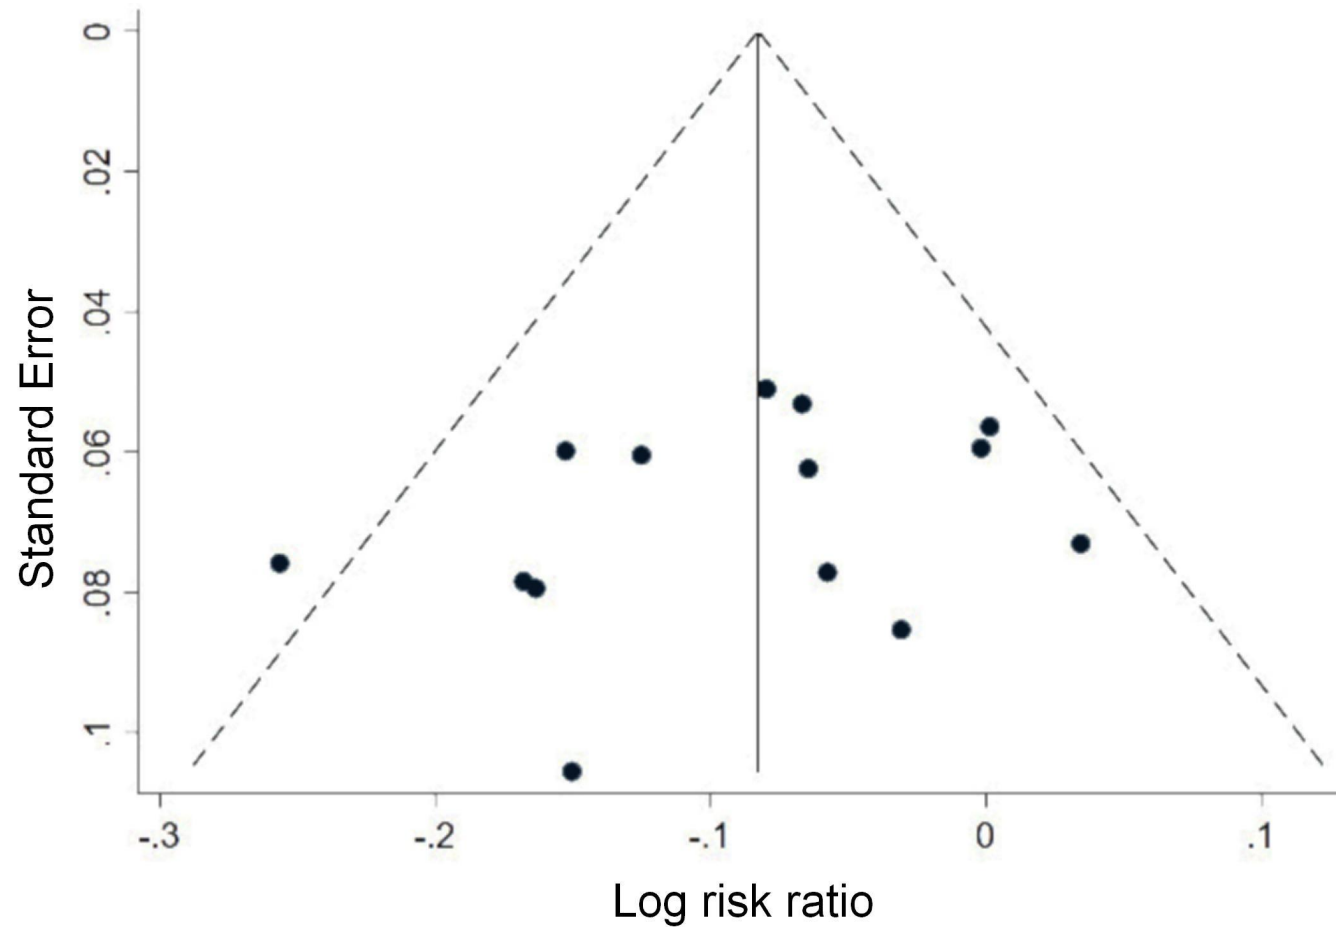

Egger's regression asymmetry test  
( $P=0.299$ , intercept=-1.08, 95%CI=-5.27 to 1.77)

Supplement: f1 [file 8818502.f1.zip]
